# Supplementary material
Source: Elsevier journal article supplement (https://www.sciencedirect.com/science/article/pii/S2255553619300163)
Supplement: mmc1 [file S2255553619300163:mmc1.docx]

**JPED_2018-613 – Material Suplementar**

**Arquivo suplementar**

**Tabela S1 - Estimativas de parâmetros para efeitos fixos (idade) e aleatórios (crianças e escolas), (±) erros-padrão e p-valores**

| Parâmetros |  | p-valor |
| --- | --- | --- |
| *Coeficientes de regressão (efeitos fixos)* |  |  |
| Intercepto | 68,43 ± 2,68 | < 0,001 |
| Idade | -3,49 ± 0,88 | < 0,001 |
| *Componentes de variância (efeitos aleatórios)* |  |  |
| Escola | 87,13 ± 43,69 |  |
| Criança | 459,27 ± 38,22 |  |
| Deviance | 2768,03 |  |
| Número de parâmetros estimados | 4 |  |

**Tabela S2 - Estimativas de parâmetros para efeitos fixos (gênero) e aleatórios (crianças e escolas), (±) erros-padrão e p-valores**

| Parâmetros |  | p-valor |
| --- | --- | --- |
| *Coeficientes de regressão (efeitos fixos)* |  |  |
| Intercepto | 57,30 ± 2,90 | < 0,001 |
| Gênero (meninos) | 20,41 ± 2,25 | < 0,001 |
| *Componentes de variância (efeitos aleatórios)* |  |  |
| Escola | 92,12 ± 43,22 |  |
| Criança | 376,36 ± 31,35 |  |
| Deviance | 2708,28 |  |
| Número de parâmetros estimados | 4 |  |

**Tabela S3 - Estimativas de parâmetros para efeitos fixos (interação idade-por-gênero) e aleatórios (crianças e escolas), (±) erros-padrão e p-valores**

| Parâmetros |  | p-valor |
| --- | --- | --- |
| *Coeficientes de regressão (efeitos fixos)* |  |  |
| Intercepto | 59,55 ± 3,02 | < 0,001 |
| Interação idade-por-gênero | 2,22 ± 0,29 | < 0,001 |
| *Componentes de variância (efeitos aleatórios)* |  |  |
| Escola | 105,26 ± 49,58 |  |
| Criança | 399,84 ± 33,35 |  |
| Deviance | 2731,80 |  |
| Número de parâmetros estimados | 4 |  |

**Tabela S4 - Estimativas de parâmetros para efeitos fixos (IMC) e aleatórios (crianças e escolas), (±) erros-padrão e p-valores**

| Parâmetros |  | p-valor |
| --- | --- | --- |
| *Coeficientes de regressão (efeitos fixos)* |  |  |
| Intercepto | 68,14 ± 2,78 | < 0,001 |
| IMC (kg·m-2) | -1,32 ± 0,43 | 0,002 |
| *Componentes de variância (efeitos aleatórios)* |  |  |
| Escola | 96,54 ± 48,37 |  |
| Criança | 466,42 ± 38,89 |  |
| Deviance | 2775,23 |  |
| Número de parâmetros estimados | 4 |  |

**Tabela S5 - Estimativas de parâmetros para efeitos fixos (KTK) e aleatórios (crianças e escolas), (±) erros-padrão e p-valores**

| Parâmetros |  | p-valor |
| --- | --- | --- |
| *Coeficientes de regressão (efeitos fixos)* |  |  |
| Intercepto | 67,54 ± 2,83 | < 0,001 |
| KTK (pontos) | -0,02 ± 0,03 | 0,399 |
| *Componentes de variância (efeitos aleatórios)* |  |  |
| Escola | 98,90 ± 50,47 |  |
| Criança | 476,89 ± 40,08 |  |
| Deviance | 2751,30 |  |
| Número de parâmetros estimados | 4 |  |

**Tabela S6 - Estimativas de parâmetros para efeitos fixos (ESE) e aleatórios (crianças e escolas), (±) erros-padrão e p-valores**

| Parâmetros |  | p-valor |
| --- | --- | --- |
| *Coeficientes de regressão (efeitos fixos)* |  |  |
| Intercepto | 70,61 ± 3,77 | < 0,001 |
| ESE (Med) | -0,80 ± 3,80 | 0,833 |
| ESE (Alto) | -5,26 ± 3,51 | 0,134 |
| *Componentes de variância (efeitos aleatórios)* |  |  |
| Escola | 98,90 ± 50,47 |  |
| Criança | 476,89 ± 40,08 |  |
| Deviance | 2751,30 |  |
| Número de parâmetros estimados | 5 |  |

**Tabela S7 - Estimativas de parâmetros para efeitos fixos (tempo de uso) e aleatórios (crianças e escolas), (±) erros-padrão e p-valores**

| Parâmetros |  | p-valor |
| --- | --- | --- |
| *Coeficientes de regressão (efeitos fixos)* |  |  |
| Intercepto | 44.68 ± 10.13 | < 0.001 |
| Tempo de uso (h∙d-1) | 1.72 ± 0.72 | 0.017 |
| *Componentes de variância (efeitos aleatórios)* |  |  |
| Escola | 92.34 ± 47.79 |  |
| Criança | 473.37 ± 39 |  |
| Deviance | 2778,00 |  |
| Número de parâmetros estimados | 4 |  |

**Tabela S8 - Estimativas de parâmetros para efeitos fixos (Nº de alunos) e aleatórios (crianças e escolas), (±) erros-padrão e p-valores**

| Parâmetros |  | p-valor |
| --- | --- | --- |
| *Coeficientes de regressão (efeitos fixos)* |  |  |
| Intercepto | 68,73 ± 3,55 | < 0,001 |
| Nº de estudantes | 0,04 ± 0,13 | 0,726 |
| *Componentes de variância (efeitos aleatórios)* |  |  |
| Escola | 115,63 ± 57,86 |  |
| Criança | 477,90 ± 39,79 |  |
| Deviance | 2786,96 |  |
| Número de parâmetros estimados | 4 |  |

**Tabela S9 - Estimativas de parâmetros para efeitos fixos (Nº de professores) e aleatórios (crianças e escolas), (±) erros-padrão e p-valores**

| Parâmetros |  | p-valor |
| --- | --- | --- |
| *Coeficientes de regressão (efeitos fixos)* |  |  |
| Intercepto | 67,76 ± 3,38 | < 0,001 |
| Nº de professores | -0,22 ± 1,17 | 0,846 |
| *Componentes de variância (efeitos aleatórios)* |  |  |
| Escola | 118,13 ± 58,47 |  |
| Criança | 477,64 ± 39,76 |  |
| Deviance | 2782,64 |  |
| Número de parâmetros estimados | 4 |  |

**Tabela S10 - Estimativas de parâmetros para efeitos fixos (ambiente escolar) e aleatórios (crianças e escolas), (±) erros-padrão e p-valores**

| Parâmetros |  | p-valor |
| --- | --- | --- |
| *Coeficientes de regressão (efeitos fixos)* |  |  |
| Intercepto | 64,37 ± 3,36 | < 0,001 |
| Ambiente escolar (misto) | 9,96 ± 5,64 | 0,078 |
| *Componentes de variância (efeitos aleatórios)* |  |  |
| Escola | 87,88 ± 47,30 |  |
| Criança | 478,51 ± 39,83 |  |
| Deviance | 2776,51 |  |
| Número de parâmetros estimados | 4 |  |

**Tabela S11 - Estimativas de parâmetros para efeitos fixos (existência de políticas ou/e práticas) e aleatórios (crianças e escolas), (±) erros-padrão e p-valores**

| Parâmetros |  | p-valor |
| --- | --- | --- |
| *Coeficientes de regressão (efeitos fixos)* |  |  |
| Intercepto | 66,04 ± 3,83 | < 0,001 |
| Existência de políticas ou/e práticas para AF (Políticas)∞ | 10,67 ± 7,62 | 0,161 |
| Existência de políticas ou/e práticas para AF (Práticas) | -0,33 ± 7,00 | 0,963 |
| *Componentes de variância (efeitos aleatórios)* |  |  |
| Escola | 105,97 ± 55,28 |  |
| Criança | 477,89 ± 39,79 |  |
| Deviance | 2771,07 |  |
| Número de parâmetros estimados | 5 |  |

**Tabela S12 - Estimativas de parâmetros para efeitos fixos (dimensão da área recreativa) e aleatórios (crianças e escolas), (±) erros-padrão e p-valores**

| Parâmetros |  | p-valor |
| --- | --- | --- |
| *Coeficientes de regressão (efeitos fixos)* |  |  |
| Intercepto | 91,23 ± 8,98 | < 0,001 |
| Dimensão da área recreativa (Média)¥ | -22,81 ± 11,32 | 0,044 |
| Dimensão da área recreativa (Grande) | -25,92 ± 9,43 | 0,006 |
| *Componentes de variância (efeitos aleatórios)* |  |  |
| Escola | 74,24 ± 39,73 |  |
| Criança | 476,55 ± 39,56 |  |
| Deviance | 2776,56 |  |
| Número de parâmetros estimados | 5 |  |

**Tabela S13 - Estimativas de parâmetros para efeitos fixos (espaço poliesportivo coberto) e aleatórios (crianças e escolas), (±) erros-padrão e p-valores**

| Parâmetros |  | p-valor |
| --- | --- | --- |
| *Coeficientes de regressão (efeitos fixos)* |  |  |
| Intercepto | 67,04 ± 3,56 | < 0,001 |
| Espaço poliesportivo coberto (≤ 49m2)# | -2,14 ± 10,44 | 0,837 |
| Espaço poliesportivo coberto (≥ 50m2) | -6,38 ± 7,72 | 0,408 |
| *Componentes de variância (efeitos aleatórios)* |  |  |
| Escola | 118,85 ± 60,76 |  |
| Criança | 477,91 ± 39,78 |  |
| Deviance | 2771,61 |  |
| Número de parâmetros estimados | 5 |  |

**Tabela S14 - Estimativas de parâmetros para efeitos fixos (material para educação física) e aleatórios (crianças e escolas), (±) erros-padrão e p-valores**

| Parâmetros |  | p-valor |
| --- | --- | --- |
| *Coeficientes de regressão (efeitos fixos)* |  |  |
| Intercepto | 63,10 ± 2,68 | < 0,001 |
| Material para educação física (não) | 19,36 ± 5,50 | < 0,001 |
| *Componentes de variância (efeitos aleatórios)* |  |  |
| Escola | 56,60 ± 29,77 |  |
| Criança | 473,37 ± 39,10 |  |
| Deviance | 2768,73 |  |
| Número de parâmetros estimados | 4 |  |

**Tabela S15 - Estimativas de parâmetros para efeitos fixos (instalações para educação física) e aleatórios (crianças e escolas), (±) erros-padrão e p-valores**

| Parâmetros |  | p-valor |
| --- | --- | --- |
| *Coeficientes de regressão (efeitos fixos)* |  |  |
| Intercepto | 68.66 ± 3.46 | < 0.001 |
| Instalações para educação física (duas) | -2.43 ± 6.95 | 0.727 |
| *Componentes de variância (efeitos aleatórios)* |  |  |
| Escola | 118.24 ± 58.10 |  |
| Criança | 477.48 ± 39.74 |  |
| Deviance | 2778.99 |  |
| Número de parâmetros estimados | 4 |  |

**Tabela S16 - Estimativas de parâmetros para efeitos fixos (duração das aulas de educação física) e aleatórios (crianças e escolas), (±) erros-padrão e p-valores**

| Parâmetros |  | p-valor |
| --- | --- | --- |
| *Coeficientes de regressão (efeitos fixos)* |  |  |
| Intercepto | 81,20 ± 5,13 | < 0,001 |
| Duração das aulas de educação física (60min) | -17,34 ± 5,83 | 0,003 |
| *Componentes de variância (efeitos aleatórios)* |  |  |
| Escola | 64,04 ± 34,40 |  |
| Criança | 476,17 ± 39,44 |  |
| Deviance | 2771,58 |  |
| Número de parâmetros estimados | 4 |  |
